# Supplementary material
Source: PubMed Central journal article supplement (PMC4143250)
Supplement: NIHMS615620-supplement-SDC_1.pdf [file NIHMS615620-supplement-SDC_1.pdf]

## Supplemental Digital Content 1. HIV-related Characteristics as of the First Pubertal Assessment\* for 2086 Perinatally HIV-infected Children, by Sex

| Characteristic                                                                    | Total<br>(N=2086)                  | Sex                               |                                   |
|-----------------------------------------------------------------------------------|------------------------------------|-----------------------------------|-----------------------------------|
|                                                                                   |                                    | Boys<br>(N=1054)                  | Girls<br>(N=1032)                 |
| <b>CD4 T-lymphocyte percentage (CD4%)</b>                                         |                                    |                                   |                                   |
| Median (IQR)                                                                      | 30 (22, 37)                        | 28 (20, 36)                       | 32 (24, 39)                       |
| 0-<15%                                                                            | 257 (12%)                          | 160 (15%)                         | 97 (9%)                           |
| 15-25%                                                                            | 462 (22%)                          | 256 (25%)                         | 206 (20%)                         |
| >25%                                                                              | 1,348 (65%)                        | 628 (60%)                         | 720 (70%)                         |
| Not available                                                                     | 19                                 | 10 (1%)                           | 9 (1%)                            |
| Nadir CD4%, Median (IQR)                                                          | 20 (12, 28)                        | 19 (11, 26)                       | 22 (14, 29)                       |
| <b>HIV-1 Plasma RNA Concentration</b>                                             |                                    |                                   |                                   |
| Median log HIV-1 RNA (IQR)                                                        | 2.90 (2.60, 4.10)                  | 3.04 (2.60, 4.27)                 | 2.74 (2.60, 3.90)                 |
| 0-400 copies/mL                                                                   | 699 (45%)                          | 350 (43%)                         | 349 (47%)                         |
| 401-10,000 copies/mL                                                              | 434 (28%)                          | 206 (26%)                         | 228 (31%)                         |
| >10,000 copies/mL                                                                 | 417 (27%)                          | 250 (31%)                         | 167 (22%)                         |
| Not available                                                                     | 536                                | 248                               | 288                               |
| Peak HIV-1 Plasma RNA Concentration (copies/mL), Median (IQR)                     | N=1550, 28,536<br>(1,844, 161,881) | N=806, 37,170<br>(2,364, 170,000) | N=744, 22,617<br>(1,417, 141,346) |
| Log Copy-years Viremia; Median (IQR)                                              | N=1079,<br>4.27 (3.38, 4.97)       | N=548<br>4.40 (3.50, 4.94)        | N=531<br>4.19 (3.29, 5.00)        |
| CDC Class C Condition, N (%)                                                      | 667 (32%)                          | 341 (32%)                         | 326 (32%)                         |
| <b>ARV treatment at first pubertal assessment (not mutually exclusive), N (%)</b> |                                    |                                   |                                   |
| On cART                                                                           | 1,334 (64%)                        | 702 (67%)                         | 632 (61%)                         |
| On PI-containing regimen                                                          | 1,232 (59%)                        | 646 (61%)                         | 586 (57%)                         |
| On NNRTI-containing regimen                                                       | 568 (27%)                          | 311 (30%)                         | 257 (25%)                         |
| <b>Duration of prior treatment** (yrs), median (IQR)</b>                          |                                    |                                   |                                   |
| Years on cART, among prior users                                                  | N=1464,<br>3.24 (1.62, 5.20)       | N=771,<br>3.16 (1.54, 4.93)       | N=693,<br>3.27 (1.67, 5.45)       |
| Years on any PI-containing regimen                                                | N=1400,<br>3.12 (1.66, 4.99)       | N=740,<br>3.00 (1.54, 4.74)       | N=660,<br>3.24 (1.75, 5.12)       |
| Years on any NNRTI-containing regimen                                             | N=938,<br>1.65 (0.78, 3.06)        | N=519,<br>1.51 (0.76, 3.01)       | N=419,<br>1.77 (0.79, 3.10)       |

IQR = interquartile range; ARV = antiretroviral; cART = combination antiretroviral treatment (at least 3 drugs from at least 3 drug classes); PI = protease inhibitor; NNRTI = non-nucleoside reverse transcriptase inhibitor; CDC = Centers for Disease Control and Prevention

\*All HIV-disease related characteristics are based on measures available prior to or at the first pubertal assessment, at age 7 years or older. BMI and height Z-scores are sex- and age-adjusted Z-scores based on CDC 2000 growth standards using the latest BMI and height measured as of the first pubertal assessment.

\*\* Duration of prior ARV summarized among the subset of youth with any prior use of regimen; each regimen is considered separately and categories are not mutually exclusive.
