# Supplementary material
Source: PubMed Central journal article supplement (PMC4143250)
Supplement: NIHMS615620-supplement-SDC_2.pdf [file NIHMS615620-supplement-SDC_2.pdf]

**Supplemental Digital Content 2. Estimated Shifts (in months) in Mean Ages at Pubertal Onset by HIV infection status and by HIV disease severity and antiretroviral treatment measures among HIV-infected youth**

| Model predictor, with adjustment for:                     | Girls                  |         |                        |         | Boys                   |         |                        |         |
|-----------------------------------------------------------|------------------------|---------|------------------------|---------|------------------------|---------|------------------------|---------|
|                                                           | Breast Development     |         | Pubic hair             |         | Genitalia              |         | Pubic Hair             |         |
|                                                           | Mean Shift<br>(95% CI) | p-value |
| <b>HIV-infected as compared to HIV-exposed uninfected</b> |                        |         |                        |         |                        |         |                        |         |
|                                                           | (N=1222)               |         | (N=1185)               |         | (N=1259)               |         | (N=1182)               |         |
| Adjusted for Race                                         | 8.40 (5.42, 11.39)     | <0.001  | 6.29 (3.07, 9.52)      | <0.001  | 10.70 (7.19, 14.22)    | <0.001  | 9.91 (6.18, 13.64)     | <0.001  |
| Adjusted for Race, Birth Cohort, BMI/HT                   | 1.29 (-1.68, 4.25)     | 0.39    | -1.98 (-4.23, 1.28)    | 0.23    | 2.60 (-1.190, 6.39)    | 0.18    | -0.16 (-4.09, 3.76)    | 0.94    |
| <b>cART use at first pubertal assessment</b>              |                        |         |                        |         |                        |         |                        |         |
|                                                           | (N=1004)               |         | (N=969)                |         | (N=1031)               |         | (N=970)                |         |
| Adjusted for Race, Birth Cohort, BMI/HT                   | -1.39 (-3.85, 1.07)    | 0.27    | -0.56 (-3.21, 2.10)    | 0.68    | 1.96 (-0.96, 4.87)     | 0.19    | 0.25 (-2.67, 3.16)     | 0.87    |
| Adjusted for Race, Birth Cohort, BMI/HT, CD4%<15%         | -1.41 (-3.88, 1.06)    | 0.26    | -0.73 (-3.40, 1.93)    | 0.59    | 1.90 (-1.02, 4.83)     | 0.20    | 0.37 (-2.57, 3.30)     | 0.81    |
| <b>PI use at first pubertal assessment</b>                |                        |         |                        |         |                        |         |                        |         |
| Adjusted for Race, Birth Cohort, BMI/HT                   | -0.79 (-3.16, 1.57)    | 0.51    | -1.05 (-3.58, 1.49)    | 0.42    | 2.11 (-0.71, 4.93)     | 0.14    | 0.10 (-2.72, 2.92)     | 0.95    |
| Adjusted for Race, Birth Cohort, BMI/HT, CD4%<15%         | -0.69 (-3.06, 1.68)    | 0.57    | -1.06 (-3.61, 1.49)    | 0.41    | 2.22 (-0.61, 5.06)     | 0.12    | 0.40 (-2.44, 3.24)     | 0.78    |
| <b>NNRTI use at first pubertal assessment</b>             |                        |         |                        |         |                        |         |                        |         |
| Adjusted for Race, Birth Cohort, BMI/HT                   | -0.83 (-3.39, 1.73)    | 0.53    | -2.39 (-5.13, 0.36)    | 0.089   | 0.13 (-2.73, 2.98)     | 0.93    | -2.39 (-5.25, 0.46)    | 0.10    |
| Adjusted for Race, Birth Cohort, BMI/HT, CD4%<15%         | -1.01 (-3.59, 1.56)    | 0.44    | -2.74 (-5.50, 0.02)    | 0.052   | 0.05 (-2.81, 2.91)     | 0.97    | -2.46 (-5.33, 0.40)    | 0.092   |

## Supplemental Digital Content 2, continued

| Model predictor, with adjustment for:                                           | Girls                  |         |                        |         | Boys                   |         |                        |         |
|---------------------------------------------------------------------------------|------------------------|---------|------------------------|---------|------------------------|---------|------------------------|---------|
|                                                                                 | Breast Development     |         | Pubic hair             |         | Genitalia              |         | Pubic Hair             |         |
|                                                                                 | Mean Shift<br>(95% CI) | p-value |
| <b>Duration on cART as of first pubertal assessment (per additional year)</b>   |                        |         |                        |         |                        |         |                        |         |
| Adjusted for Race, Birth Cohort, BMI/HT                                         | -0.33 (-0.96, 0.30)    | 0.30    | -0.15 (-0.83, 0.53)    | 0.67    | 0.70 (0.00, 1.40)      | 0.052   | 0.62 (-0.08, 1.33)     | 0.084   |
| Adjusted for Race, Birth Cohort, BMI/HT, CD4%<15%                               | -0.30 (-0.93, 0.33)    | 0.36    | -0.09 (-0.77, 0.59)    | 0.80    | 0.76 (0.06, 1.47)      | 0.034   | 0.70 (-0.01, 1.42)     | 0.053   |
| <b>Duration on PIs as of first pubertal assessment (per additional year)</b>    |                        |         |                        |         |                        |         |                        |         |
| Adjusted for Race, Birth Cohort, BMI/HT                                         | -0.37 (-0.97, 0.23)    | 0.23    | -0.55 (-1.19, 0.10)    | 0.10    | -0.55 (-0.15, 1.25)    | 0.12    | 0.25 (-0.45, 0.96)     | 0.49    |
| Adjusted for Race, Birth Cohort, BMI/HT, CD4%<15%                               | -0.32 (-0.92, 0.29)    | 0.30    | -0.51 (-1.16, 0.15)    | 0.13    | 0.64 (-0.07, 1.34)     | 0.076   | 0.34 (-0.37, 1.05)     | 0.35    |
| <b>Duration on NNRTIs as of first pubertal assessment (per additional year)</b> |                        |         |                        |         |                        |         |                        |         |
| Adjusted for Race, Birth Cohort, BMI/HT                                         | -0.41 (-1.16, 0.33)    | 0.28    | -0.51 (-1.30, 0.28)    | 0.21    | -0.51 (-1.40, 0.37)    | 0.26    | -0.73 (-1.62, 0.16)    | 0.11    |
| Adjusted for Race, Birth Cohort, BMI/HT, CD4%<15%                               | -0.44 (-1.19, 0.30)    | 0.24    | -0.53 (-1.33, 0.27)    | 0.19    | -0.54 (-1.43, 0.35)    | 0.23    | -0.74 (-1.64, 0.15)    | 0.10    |
